1  
2  
3  
4  
5  
6  
7  
8  
9  
10  
11  
12  
13  
14  
15  
16  
17  
18  
19  
20  
21  
22  
23  
24  
25  
26  
27

**Endothelial Cell Cycle State Determines Propensity for Arterial-Venous Fate**

Nicholas W. Chavkin<sup>1,2</sup>, Gael Genet<sup>1,2</sup>, Mathilde Poulet<sup>3</sup>, Nafiisha Genet<sup>1,2</sup>, Corina Marziano<sup>1,2</sup>,  
Hema Vasavada<sup>3</sup>, Elizabeth A. Nelson<sup>1,2</sup>, Anupreet Kour<sup>2</sup>, Stephanie P. McDonnell<sup>1,2</sup>, Mahalia  
Huba<sup>1,2</sup>, Kenneth Walsh<sup>2</sup> and Karen K. Hirschi<sup>1,2,3\*</sup>

<sup>1</sup>Department of Cell Biology  
University of Virginia School of Medicine  
Charlottesville, VA, USA 22908

<sup>2</sup>Cardiovascular Research Center  
University of Virginia School of Medicine  
Charlottesville, VA, USA 22908

<sup>3</sup>Department of Medicine  
Yale Cardiovascular Research Center  
Yale University School of Medicine  
New Haven, CT, USA 06520

\*Correspondence: [kkh4yy@virginia.edu](mailto:kkh4yy@virginia.edu)

## 28 **Summary**

29           Formation and maturation of a functional blood vascular system is required for the  
30 development and maintenance of all tissues in the body. During the process of blood vessel  
31 development, primordial endothelial cells are formed and become specified toward arterial or  
32 venous fates to generate a circulatory network that provides nutrients and oxygen to, and removes  
33 metabolic waste from, all tissues<sup>1-3</sup>. Specification of arterial and venous endothelial cells occurs in  
34 conjunction with suppression of endothelial cell cycle progression<sup>4,5</sup>, and endothelial cell  
35 hyperproliferation is associated with potentially lethal arterial-venous malformations<sup>6</sup>. However,  
36 the mechanistic role that cell cycle state plays in arterial-venous specification is unknown. Herein,  
37 studying retinal vascular development in Fucci2aR reporter mice<sup>7</sup>, we found that venous and  
38 arterial endothelial cells are in distinct cell cycle states during development and in adulthood. That  
39 is, venous endothelial cells reside in early G1 state, while arterial endothelial cells reside in late  
40 G1 state. Endothelial cells in early vs. late G1 exhibited significant differences in gene expression  
41 and activity, especially among BMP/TGF- $\beta$  signaling components. The early G1 state was found  
42 to be essential for BMP4-induced venous specification, whereas late G1 state is essential for TGF-  
43  $\beta$ 1-induced arterial specification. In a mouse model of endothelial cell hyperproliferation and  
44 disrupted vascular remodeling, pharmacological inhibition of endothelial cell cycle rescues the  
45 arterial-venous specification defects. Collectively, our results show that endothelial cell cycle  
46 control plays a key role in arterial-venous network formation, and distinct cell cycle states provide  
47 distinct windows of opportunity for the molecular induction of arterial vs. venous specification.

## 48 **Introduction**

49           Healthy tissue development and maintenance requires a functional blood circulatory  
50 network comprised of arterial and venous blood vessels lined with specialized endothelial cells.  
51 Acquisition of these specialized arterial and venous endothelial cell phenotypes generally occurs  
52 in conjunction with suppression of endothelial cell cycle progression<sup>1,4,5</sup>. However, we lack  
53 understanding of mechanisms that coordinately regulate endothelial cell growth suppression and  
54 phenotypic specialization during vascular remodeling, which creates significant roadblocks for  
55 clinical therapies, tissue engineering and regenerative medicine.

56           Our previous work has shown that shear stress, specifically at magnitudes typically found  
57 in arteries and arterioles, activates a Notch-Cx37-p27 signaling axis to promote endothelial cell  
58 cycle arrest, and that this enables the upregulation of arterial genes<sup>4</sup>. However, it is not clear  
59 whether a specific state of the cell cycle plays a role in venous endothelial cell specification, or  
60 whether distinct cell cycle states control the differential specification of arterial and venous  
61 endothelial cells. In this regard, distinct signaling pathways have been implicated in the  
62 upregulation of arterial or venous genes, including TGF- $\beta$  and BMP<sup>8-12</sup>, respectively, but how  
63 these signaling pathways function in coordination with cell cycle state to induce specific  
64 endothelial cell phenotypes is also not known.

65           To fill these knowledge gaps, we created mice expressing the Fluorescent Ubiquitination  
66 Cell Cycle Indicator (FUCCI) reporter specifically in endothelial cells. Using these mice, we  
67 demonstrated that endothelial cells in veins/venules vs. arteries/arterioles are in distinct cell cycle  
68 states during vascular development and in adulthood; early G1 vs. late G1, respectively. Although  
69 both early G1 and late G1 represent states of “growth arrest”, in embryonic stem cells, these states  
70 are molecularly distinct and represent distinct windows of opportunity for the induction of  
71 mesoderm/endoderm vs. ectoderm lineages<sup>15,16</sup>.

72           We then performed studies using human umbilical vein endothelial cells transduced with  
73 a lentivirus expressing the FUCCI reporter<sup>13</sup> (HUVEC-FUCCI) to demonstrate that shear stress  
74 typical of veins/venules (4 dynes/cm<sup>2</sup>) promotes early G1 arrest; whereas, shear stress typical of  
75 arteries/arterioles (12 dynes/cm<sup>2</sup>) promotes late G1 arrest. Furthermore, these different endothelial  
76 cell cycle states are shown to provide distinct windows of opportunity for gene expression in  
77 response to extrinsic signals. That is, components of the BMP/TGF- $\beta$  signaling pathways are  
78 shown to be differentially regulated in early vs. late G1, and BMP signaling induces venous gene

79 expression only in early G1; whereas, TGF- $\beta$  induces arterial gene expression only in late G1.  
80 Finally, using Cx37-deficient mice that exhibit endothelial cell hyperproliferation, dysregulated  
81 vascular remodeling and impaired arterial development, we showed that pharmacological  
82 induction of endothelial cell cycle arrest in late G1 state rescues these vascular defects and restores  
83 normal arterial-venous network formation.

84 These studies reveal a critical and previously unknown molecular connection between  
85 endothelial cell cycle state and fate; specifically, endothelial cell cycle state determines the  
86 propensity for arterial vs. venous fate specification.

## 87 **Results**

### 88 **Arterial-Venous Endothelial Cell Cycle State**

89 To determine the cell cycle state of endothelial cells during arterial-venous specification,  
90 we used mice expressing the Fluorescent Ubiquitination Cell Cycle Indicator (FUCCI) reporter,  
91 which enables clear distinction among cells in early G1, late G1 and S/G2/M states (**Fig. 1A**). To  
92 specifically label endothelial cells, we crossed mice expressing a FUCCI reporter with a flox-stop-  
93 flox cassette<sup>7</sup> with mice expressing the endothelial-specific *Cdh5-CreER*<sup>T2,14</sup>. In these tamoxifen-  
94 treated mice, at postnatal day (P)6, we examined retinal endothelial cells in the developing arterial-  
95 venous network (**Fig. 1B**). We found that endothelial cells in S/G2/M states (green) are in the  
96 remodeling areas closer to venous vessels. Endothelial cells in and near the arterial branches are  
97 in late G1 state (red) (**Fig. 1C**); whereas, endothelial cells in and near the venous branches are in  
98 early G1 (unlabeled) (**Fig. 1D**). These patterns persisted in P15 retinal vasculature, in which  
99 arterial and venous branches have matured (**Fig. 1E-G**), and into adulthood (**Ext. Fig. 1A-C**).

100 Quantification of endothelial cell cycle states in blood vessels at P6 and P15 confirmed that  
101 arterial vessels have a greater percentage of endothelial cells in late G1, while venous vessels have  
102 a greater percentage of endothelial cells in early G1 (**Fig. 1H-I**). Additionally, we found that  
103 throughout the course of the retinal vascular plexus maturation, early G1 endothelial cells associate  
104 closer to veins/venules while late G1 endothelial cells associate closer to arteries/arterioles (**Ext.**  
105 **Fig. 1D-E**). Consistent with these findings, we observed that arterial shear flow forces (12  
106 dynes/cm<sup>2</sup>) increase the proportion of HUVEC-FUCCI in late G1 state and concomitantly reduce  
107 the proportion in early G1 state, compared to venous shear flow forces (4 dynes/cm<sup>2</sup>), which  
108 promote early G1 state (**Ext. Fig. 1F**), suggesting that differential shear flow forces can mediate  
109 endothelial cell cycle state.

110 To further investigate the phenotypes of endothelial cells in distinct cell cycle states, we  
111 used fluorescence activated cell sorting (FACS) to isolate P6 and P15 retinal CD31+CD45-  
112 endothelial cells from our FUCCI reporter mice (sorting strategy shown in **Fig. 2C**). The  
113 endothelial cells in early G1, late G1 and S/G2/M states were processed for RNA isolation and  
114 qPCR analysis. We found that endothelial cells in late G1 exhibit significantly higher expression  
115 of arterial genes (**Fig. 1J-K; Ext. Fig. 1G-H**), and cells in early G1 exhibit significantly higher  
116 expression of venous genes (**Fig. 1L-M**). Collectively, these results revealed that endothelial cells  
117 in venous vs. arterial branches exhibit distinct cell cycle states; early G1 vs. late G1.

## 118 Cell Cycle Regulation of TGF- $\beta$ /BMP Signaling

119 Recently, embryonic stem cell differentiation towards specific lineages was found to be  
120 controlled by cell cycle state regulation of gene expression, chromatin remodeling and  
121 transcription factor binding<sup>15,16</sup>. To begin to investigate the mechanistic role of cell cycle state in  
122 endothelial cells, we performed gene expression analyses of endothelial cells in distinct cell cycle  
123 states. To do so, we FACS-isolated HUVEC-FUCCI cells into early G1, late G1 and S/G2/M states  
124 (**Fig. 2A-C**) and isolated RNA therefrom.

125 Bulk RNA sequencing analysis of endothelial cells in different cell cycle states revealed  
126 high transcriptional variation between early G1 and late G1 states (**Fig. 2D**). We performed Gene  
127 Ontology analysis to determine which signaling pathways were significantly different and found  
128 that the TGF- $\beta$  and transmembrane serine/threonine kinase signaling pathways are significantly  
129 variable between early G1 and late G1 (**Fig. 2E**). These two pathways contain many genes in the  
130 TGF- $\beta$  and BMP signaling pathways, which are known to be involved in arterial-venous  
131 specification<sup>11,12,17,18</sup>, and we found many of these genes differentially regulated in early vs. late  
132 G1 (**Fig. 1F**). Furthermore, via Western Blot analysis of endothelial cells in early G1 and late G1,  
133 we also found that the protein expression of some TGF- $\beta$  signaling components (phospho-SMAD3  
134 and TGFBR1) are increased in late G1 (**Fig. 2G-H, Ext. Fig. 2A-B**), suggesting that TGF- $\beta$   
135 signaling may be more active in late G1 and less active in early G1. We found no differences in  
136 noncanonical TGF- $\beta$  signaling through ERK1/2 or AKT between cell cycle states or after TGF-  
137  $\beta$ 1/BMP4 stimulation (**Ext. Fig. 2C-F**). Thus, these results suggest that canonical SMAD-  
138 mediated TGF- $\beta$  and BMP signaling may be differentially regulated in distinct endothelial cell  
139 cycle states, which could then enable arterial vs. venous gene induction after TGF- $\beta$  or BMP  
140 stimulation, respectively.

141

## 142 Cell Cycle Regulation of Arterial-Venous Fate

143 We then examined whether TGF- $\beta$  and BMP signaling are activated in endothelial cells in  
144 distinct cell cycle states. The key signaling proteins for the TGF- $\beta$ /BMP signaling pathways are  
145 SMAD proteins<sup>19</sup>. SMAD4 serves as the intermediate co-activator, where TGF- $\beta$ 1 induces  
146 SMAD2/3 binding to SMAD4 and BMP4 induces SMAD1/5 binding to SMAD4<sup>20</sup>, and these  
147 transcription factor complexes function to promote gene expression (**Fig. 3A**). Using our HUVEC-

148 FUCCI, we FACS-isolated endothelial cells in early G1 and late G1 states, and performed SMAD4  
149 co-immunoprecipitation. We found that TGF- $\beta$ 1 (1 ng/ml for 2 hr) induces greater SMAD2/3  
150 binding to SMAD4 in late G1 state, while BMP4 (5 ng/ml for 2 hr) induces greater SMAD1/5  
151 binding to SMAD4 in early G1 state (**Fig. 3B-C**). Thus, BMP and TGF- $\beta$  signaling appear to be  
152 differentially active in early G1 vs. late G1, respectively.

153 To investigate whether their downstream target genes were differentially susceptible to  
154 SMAD4 transcription factor binding in endothelial cells in distinct cell cycle states, we first  
155 performed ATAC-Sequencing to identify regions of DNA near arterial-venous genes that were  
156 open in HUVEC-FUCCI in early G1 vs. late G1 states (**Ext. Fig. 3A-B**). Surprisingly, we found  
157 no significant differences in the size or location of the open chromatin regions near known arterial-  
158 venous genes (EFNB2 and EPHB4, respectively). We then performed SMAD4 chromatin  
159 immunoprecipitation PCR to quantify SMAD4 transcription factor binding to their specific  
160 ATAC-seq peaks in HUVEC-FUCCI in early G1 and late G1 states, in response to TGF- $\beta$  or BMP  
161 stimulation. We found that TGF- $\beta$ 1 (1 ng/ml for 4 hr) induces more SMAD4 binding to ATAC-  
162 Seq peaks near the EFNB2 gene, while BMP4 (5 ng/ml for 4 hr) induces more SMAD4 binding to  
163 ATAC-Seq peaks near the EPHB4 gene (**Fig. 3D**).

164 To further test whether BMP4 and TGF- $\beta$ 1 signaling promote venous vs. arterial gene  
165 expression in distinct cell cycle states, we treated HUVEC-FUCCI cells, either non-sorted  
166 (control) or FACS-isolated in early G1 and late G1 states, with BMP4 or TGF- $\beta$ 1 for 8 hr, and  
167 measured changes in mRNA expression via qPCR. Importantly, endothelial cell cycle state was  
168 not changed within this treatment duration (**Ext. Fig. 3C**). We found that TGF- $\beta$ 1 does not induce  
169 venous gene expression in any condition, and induces arterial genes only in endothelial cells in  
170 late G1 state. Conversely, BMP4 induces only venous gene EPHB4 and only in endothelial cells  
171 in early G1 (**Fig. 3E**). Thus, we found that cell cycle state-mediated activation of the TGF- $\beta$  and  
172 BMP signaling pathways enables differential regulation of arterial and venous genes, respectively.

173 Finally, we performed knockdown experiments of SMAD genes to determine the  
174 requirement for SMAD signaling in TGF- $\beta$ 1- and BMP4-induced arterial-venous gene expression.  
175 Transfection of siRNA yielded >80% knockdown of targeted SMAD genes (**Ext. Fig. 3D**). We  
176 found that siRNA-mediated knockdown of SMAD2/3 prevents TGF- $\beta$ 1-induced EFNB2 gene  
177 induction in late G1, and knockdown of SMAD1/5 prevents BMP4-induced EPHB4 gene

178 induction in early G1 (**Fig. 3F**). These results suggest that late G1 state is required for TGF- $\beta$ 1-  
179 induced arterial gene induction through SMAD2/3, and early G1 state is required for BMP4-  
180 induced venous gene induction through SMAD1/5 in endothelial cells.

181

## 182 **Rescue of Arterial-Venous Fate Defects**

183 To investigate the role of endothelial cell cycle state in arterial-venous specification in  
184 vivo, we tested whether pharmacological manipulation of cell cycle state could rescue arterial-  
185 venous specification defects associated with endothelial cell hyperproliferation. We used  
186 Connexin (Cx)37-deficient mice (Cx37-KO) in which we previously found endothelial cell  
187 hyperproliferation, downregulated cell cycle inhibitor p27 (Cdkn1b), and impaired arterial blood  
188 vessel maturation<sup>4</sup>. p27 induces G1 arrest in cells by interacting and inhibiting the Cyclin D-CDK4  
189 and Cyclin E-CDK2 complexes<sup>21,22</sup>, which normally function to promote G1-to-S transition<sup>23</sup>.

190 Cell cycle state can be regulated through pharmacological inhibition of CDK proteins.  
191 Specifically, we found that CDK4/6i (Palbociclib, PD-0332991) reduces active cycling (S/G2/M)  
192 and promotes late G1 arrest in endothelial cells (**Ext. Fig. 4A**). Therefore, we treated Cx37-KO  
193 mice with CDK4/6i during retinal vascular development and assessed its impact on vascular  
194 remodeling and arterial-venous specification. We found that the vascular hyper-density and arterial  
195 maturation defects (indicated by reduced  $\alpha$ SMA coverage) observed in P6 retinas of Cx37-KO  
196 mice are both rescued with CDK4/6i treatment (**Fig. 4A-E**). Importantly, we found that CDK4/6i  
197 treatment does not significantly affect mouse growth/weight (**Ext. Fig. 4B**).

198 We then investigated developing retinal endothelial cell cycle state in Cx37<sup>-/-</sup>;R26p-  
199 FUCCI2 mice compared to wildtype controls, as well as the effects of CDK4/6i treatment on  
200 endothelial cell cycle state during vascular remodeling. Firstly, we found that, in Cx37-KO mice  
201 compared to wildtype controls, a higher proportion of endothelial cells in arterial branches and  
202 plexi about the venous branches are actively cycling (S/G2/M), and a lower proportion of  
203 endothelial cells in arterial and venous branches and their associated plexi are in early G1 (**Fig.**  
204 **4F-Q**, **Ext. Fig. 4C-F**). Interestingly, a higher proportion of endothelial cells in the plexi above  
205 the venous and arterial branches are also in late G1 (**Fig. 1N-Q and Ext. Fig. 4C-F**).

206 When Cx37<sup>-/-</sup>;R26p-FUCCI2 mice were treated with the CDK4/6i, they exhibited an  
207 increased proportion of endothelial cells in arterial branches in late G1 state and a reduced  
208 proportion in early G1 and S/G2/M cell cycle states (**Fig. 4F-I**). We did not observe large changes



209 in the cell cycle state of endothelial cells within venous branches themselves or the plexi above  
210 the arterial blood vessels (**Fig. 4J-M, Ext. Ext. Fig. 4C-F**). However, in the remodeling plexi  
211 above the venous blood vessels, we found significantly less endothelial cells in early G1 and  
212 S/G2/M states and significantly more in late G1 after CDK4/6i treatment (**Fig. 4N-Q**). We further  
213 confirmed that CDK4/6i treatment inhibits cell proliferation assessed by EdU incorporation (**Ext.**  
214 **Fig. 4G-J**). Thus, we found that inducing late G1 arrest in retinal endothelial cells in the Cx37-  
215 KO mice is sufficient to rescue their defects in arterial development and vascular remodeling.

216 **Discussion**

217           These studies reveal that arterial and venous endothelial cells reside in distinct cell cycle  
218 states during development and into adulthood. Although both venous and arterial endothelial cells  
219 are “growth arrested”, endothelial cells in venous branches are in an early G1 phase and endothelial  
220 cells in arterial branches are in a late G1 phase of cell cycle. Notably, the magnitude of shear stress  
221 that endothelial cells experience was shown to control the cell cycle state in which they reside.  
222 Specifically, shear stress magnitudes typically experienced by venous endothelial cells promote  
223 early G1 arrest, whereas the greater blood flow forces sensed by arterial endothelial cells promote  
224 late G1 arrest. These effects are likely mediated via the activation of distinct downstream signaling  
225 pathways that differentially regulate cell cycle state, consistent with previous studies that showed  
226 arterial shear stress activates Notch signaling to promote late G1 arrest that enables arterial gene  
227 expression<sup>4</sup>.

228           Our studies are the first to identify a molecular link between cell cycle state and endothelial  
229 cell fate, and they provide a framework that integrates other observations in the field. For example,  
230 although BMP<sup>12</sup> and TGF- $\beta$ <sup>10</sup> signaling had been shown to promote venous and arterial gene  
231 expression, respectively, it was not clear how these pathways are coordinated with the shear stress  
232 differences that are associated with venous vs. arterial systems. Our findings show that the early  
233 G1 state, induced by low shear stress, will license endothelial cells to be permissive for BMP  
234 signaling and thereby allow venous specification. In contrast, high shear stress promotes a late G1  
235 state, and this is more permissive for TGF- $\beta$  signaling that promotes arterial specification. Thus,  
236 these studies provide a paradigm of arterial vs. venous phenotypic specialization that involves  
237 flow-mediated control of distinct signaling pathways that serve to position endothelial cells in  
238 different cell cycle states and thereby enable arterial vs. venous patterns of gene expression.

239           Other recent studies have highlighted the importance of cell cycle regulation in endothelial  
240 cell differentiation. Coronary artery development is impaired when cell cycle control is disrupted  
241 in the progenitor endothelial cells coming from the sinus venosus<sup>5</sup>. Also, p27-mediated cell cycle  
242 arrest is required for endothelial cells to undergo hemogenic specification during definitive  
243 hematopoiesis<sup>26</sup>. Thus, regulation of cell cycle state may be required for the phenotypic  
244 specialization of all endothelial cell subtypes. Further, given that some endothelial cells can  
245 undergo phenotypic specification in the absence of blood flow<sup>24,25</sup>, it is possible that control of cell

246 cycle by other microenvironment factors enables phenotypic specialization under these unique  
247 circumstances.

248         The distinction of cell cycle states between the endothelial cells of veins and arteries is  
249 maintained into adulthood. Thus, flow-mediated regulation of endothelial cell cycle state may be  
250 broadly required for adult vascular homeostasis and its dysregulation may contribute to vascular  
251 diseases. Indeed, arterial-venous malformations can be associated with underlying endothelial cell  
252 hyperproliferation that may contribute to disruptions in arterial-venous identity<sup>17,27-29</sup>. This is of  
253 particular interest given that pharmacological cell cycle arrest in late G1 was found to be sufficient  
254 to rescue arterial-venous specification and maturation in an animal model of dysregulated vascular  
255 network formation. These experiments employed the CDK4/6 inhibitor palbociclib that is FDA  
256 approved for the treatment of HR-positive, HER2-negative metastatic breast cancer<sup>30,31</sup>, and is  
257 currently being investigated for other forms of cancer<sup>32,33,34</sup>. Thus, palbociclib or similar drugs may  
258 be beneficial for the treatment of vascular diseases, such as arteriovenous and cerebral cavernous  
259 malformations, and they may also have utility for the control arterial-venous identity during the  
260 creation of arteriovenous fistulas, coronary artery bypass grafting and vascular procedures.

261

262 **Acknowledgements**

263 We thank the scientists at the Yale Center for Genomic Analysis, Yale Flow Cytometry  
264 Facility, and the University of Virginia Flow Cytometry Facility for their expert technical ability  
265 and advice. We also thank the University of Virginia Health Sciences Library and Research  
266 Computing centers for their expert advice and guidance on bioinformatic analysis. We greatly  
267 appreciate the lab of Dr. Martin Schwartz (Professor, Yale University) for providing equipment  
268 and technical advice on shear flow experiments, and the lab of Dr. Patrick Gallagher (Professor,  
269 Yale University) for providing advice and reagents for the ATAC-sequencing experiments. The  
270 experiments in this study were supported by NIH grants to N.W.C. (T32 HL007224, T32  
271 HL007284), K.W. (R01 HL142650 and R01 HL141256) and K.K.H. (R01 HL146056 and  
272 U2EB017103), and AHA grant to N.G. (19POST34400065).

273

274 **Author contributions**

275 N.W.C. coordinated the project and wrote the manuscript. N.W.C., G.G., M.P., N.G., C.M.,  
276 K.W., and K.K.H. contributed to experimental design and data analysis. N.W.C. performed retina  
277 cell cycle analysis, next-generation sequencing and bioinformatics analysis, and *in vitro*  
278 mechanistic studies. G.G. performed *in vitro* protein analysis. G.G. and M.P. performed *in vivo*  
279 CDK4/6i experiments. N.G. and C.M. assisted with image analysis and supplemental control  
280 experiments. H.V. and E.N. generated HUVEC-FUCCI cell lines. A.K. assisted with  
281 bioinformatics analysis. S.M. and M.H. maintained mouse lines and performed *in vivo*  
282 experiments.

283 **References**

- 284 1 Marcelo, K. L., Goldie, L. C. & Hirschi, K. K. Regulation of endothelial cell differentiation  
285 and specification. *Circ Res* **112**, 1272-1287, doi:10.1161/circresaha.113.300506 (2013).
- 286 2 Fang, J. S. & Hirschi, K. K. Molecular regulation of arteriovenous endothelial cell  
287 specification. *F1000Res* **8**, doi:10.12688/f1000research.16701.1 (2019).
- 288 3 Fish, J. E. & Wythe, J. D. The Molecular Regulation of Arteriovenous Specification and  
289 Maintenance. *Developmental Dynamics* **224**, 391-409, doi:10.1002/dvdy (2015).
- 290 4 Fang, J. S. *et al.* Shear-induced Notch-Cx37-p27 axis arrests endothelial cell cycle to  
291 enable arterial specification. *Nat Commun* **8**, 2149, doi:10.1038/s41467-017-01742-7  
292 (2017).
- 293 5 Su, T. *et al.* Single-cell analysis of early progenitor cells that build coronary arteries.  
294 *Nature* **559**, 356-362, doi:10.1038/s41586-018-0288-7 (2018).
- 295 6 Pang, C., Lim, C. S., Brookes, J., Tsui, J. & Hamilton, G. Emerging importance of  
296 molecular pathogenesis of vascular malformations in clinical practice and classifications.  
297 *Vasc Med*, 1358863X20918941, doi:10.1177/1358863X20918941 (2020).
- 298 7 Mort, R. L. *et al.* Fucci2a: a bicistronic cell cycle reporter that allows Cre mediated tissue  
299 specific expression in mice. *Cell Cycle* **13**, 2681-2696,  
300 doi:10.4161/15384101.2015.945381 (2014).
- 301 8 van Royen, N. *et al.* Exogenous application of transforming growth factor beta 1 stimulates  
302 arteriogenesis in the peripheral circulation. *FASEB J* **16**, 432-434, doi:10.1096/fj.01-  
303 0563fje (2002).
- 304 9 Lebrin, F., Deckers, M., Bertolino, P. & Ten Dijke, P. TGF-beta receptor function in the  
305 endothelium. *Cardiovasc Res* **65**, 599-608, doi:10.1016/j.cardiores.2004.10.036 (2005).
- 306 10 Iso, T. *et al.* Dll4-selective Notch signaling induces ephrinB2 gene expression in  
307 endothelial cells. *Biochem Biophys Res Commun* **341**, 708-714,  
308 doi:10.1016/j.bbrc.2006.01.020 (2006).
- 309 11 Mouillesseaux, K. P. *et al.* Notch regulates BMP responsiveness and lateral branching in  
310 vessel networks via SMAD6. *Nat Commun* **7**, 13247, doi:10.1038/ncomms13247 (2016).
- 311 12 Neal, A. *et al.* Venous identity requires BMP signalling through ALK3. *Nat Commun* **10**,  
312 453, doi:10.1038/s41467-019-08315-w (2019).

- 313 13 Koh, S. B. *et al.* A quantitative FastFUCCI assay defines cell cycle dynamics at a single-  
314 cell level. *J Cell Sci* **130**, 512-520, doi:10.1242/jcs.195164 (2017).
- 315 14 Sorensen, I., Adams, R. H. & Gossler, A. DLL1-mediated Notch activation regulates  
316 endothelial identity in mouse fetal arteries. *Blood* **113**, 5680-5688, doi:10.1182/blood-  
317 2008-08-174508 (2009).
- 318 15 Pauklin, S. & Vallier, L. The cell-cycle state of stem cells determines cell fate propensity.  
319 *Cell* **155**, 135-147, doi:10.1016/j.cell.2013.08.031 (2013).
- 320 16 Dalton, S. Linking the Cell Cycle to Cell Fate Decisions. *Trends Cell Biol* **25**, 592-600,  
321 doi:10.1016/j.tcb.2015.07.007 (2015).
- 322 17 Larrivee, B. *et al.* ALK1 signaling inhibits angiogenesis by cooperating with the Notch  
323 pathway. *Dev Cell* **22**, 489-500, doi:10.1016/j.devcel.2012.02.005 (2012).
- 324 18 Pardali, E., Goumans, M. J. & ten Dijke, P. Signaling by members of the TGF-beta family  
325 in vascular morphogenesis and disease. *Trends Cell Biol* **20**, 556-567,  
326 doi:10.1016/j.tcb.2010.06.006 (2010).
- 327 19 Shi, Y. & Massagué, J. Mechanisms of TGF-beta signaling from cell membrane to the  
328 nucleus. *Cell* **113**, 685-700, doi:10.1016/s0092-8674(03)00432-x (2003).
- 329 20 Feng, X. H. & Derynck, R. Specificity and versatility in tgf-beta signaling through Smads.  
330 *Annu Rev Cell Dev Biol* **21**, 659-693, doi:10.1146/annurev.cellbio.21.022404.142018  
331 (2005).
- 332 21 Chu, I. *et al.* p27 phosphorylation by Src regulates inhibition of cyclin E-Cdk2. *Cell* **128**,  
333 281-294, doi:10.1016/j.cell.2006.11.049 (2007).
- 334 22 Ray, A., James, M. K., Larochele, S., Fisher, R. P. & Blain, S. W. p27Kip1 inhibits cyclin  
335 D-cyclin-dependent kinase 4 by two independent modes. *Mol Cell Biol* **29**, 986-999,  
336 doi:10.1128/MCB.00898-08 (2009).
- 337 23 Suryadinata, R., Sadowski, M. & Sarcevic, B. Control of cell cycle progression by  
338 phosphorylation of cyclin-dependent kinase (CDK) substrates. *Biosci Rep* **30**, 243-255,  
339 doi:10.1042/BSR20090171 (2010).
- 340 24 Chong, D. C., Koo, Y., Xu, K., Fu, S. & Cleaver, O. Stepwise arteriovenous fate acquisition  
341 during mammalian vasculogenesis. *Dev Dyn* **240**, 2153-2165, doi:10.1002/dvdy.22706  
342 (2011).

- 343 25 Pitulescu, M. E. *et al.* Dll4 and Notch signalling couples sprouting angiogenesis and artery  
344 formation. *Nat Cell Biol* **19**, 915-927, doi:10.1038/ncb3555 (2017).
- 345 26 Marcelo, K. L. *et al.* Hemogenic endothelial cell specification requires c-Kit, Notch  
346 signaling, and p27-mediated cell-cycle control. *Dev Cell* **27**, 504-515,  
347 doi:10.1016/j.devcel.2013.11.004 (2013).
- 348 27 Baeyens, N. *et al.* Defective fluid shear stress mechanotransduction mediates hereditary  
349 hemorrhagic telangiectasia. *J Cell Biol* **214**, 807-816, doi:10.1083/jcb.201603106 (2016).
- 350 28 Ola, R. *et al.* PI3 kinase inhibition improves vascular malformations in mouse models of  
351 hereditary haemorrhagic telangiectasia. *Nat Commun* **7**, 13650,  
352 doi:10.1038/ncomms13650 (2016).
- 353 29 Ola, R. *et al.* SMAD4 prevents flow induced arterial-venous malformations by inhibiting  
354 Casein Kinase 2. *Circulation* **138**, 2379-2394, doi:10.1161/circulationaha.118.033842  
355 (2018).
- 356 30 Finn, R. S. *et al.* Palbociclib and Letrozole in Advanced Breast Cancer. *N Engl J Med* **375**,  
357 1925-1936, doi:10.1056/NEJMoa1607303 (2016).
- 358 31 Verma, S. *et al.* Palbociclib in Combination With Fulvestrant in Women With Hormone  
359 Receptor-Positive/HER2-Negative Advanced Metastatic Breast Cancer: Detailed Safety  
360 Analysis From a Multicenter, Randomized, Placebo-Controlled, Phase III Study  
361 (PALOMA-3). *Oncologist* **21**, 1165-1175, doi:10.1634/theoncologist.2016-0097 (2016).
- 362 32 Grande, E. *et al.* The PALBONET Trial: A Phase II Study of Palbociclib in Metastatic  
363 Grade 1 and 2 Pancreatic Neuroendocrine Tumors (GETNE-1407). *Oncologist*,  
364 doi:10.1634/theoncologist.2020-0033 (2020).
- 365 33 Adkins, D. *et al.* Palbociclib and cetuximab in platinum-resistant and in cetuximab-  
366 resistant human papillomavirus-unrelated head and neck cancer: a multicentre, multigroup,  
367 phase 2 trial. *Lancet Oncol* **20**, 1295-1305, doi:10.1016/S1470-2045(19)30405-X (2019).
- 368 34 Edelman, M. J. *et al.* SWOG S1400C (NCT02154490)-A Phase II Study of Palbociclib for  
369 Previously Treated Cell Cycle Gene Alteration-Positive Patients with Stage IV Squamous  
370 Cell Lung Cancer (Lung-MAP Substudy). *J Thorac Oncol* **14**, 1853-1859,  
371 doi:10.1016/j.jtho.2019.06.027 (2019).
- 372 35 Simon, A. M., Goodenough, D. A., Li, E. & Paul, D. L. Female infertility in mice lacking  
373 connexin 37. *Nature* **385**, 525-529, doi:10.1038/385525a0 (1997).

- 374 36 Abe, T. *et al.* Visualization of cell cycle in mouse embryos with Fucci2 reporter directed  
375 by Rosa26 promoter. *Development* **140**, 237-246, doi:10.1242/dev.084111 (2013).
- 376 37 Coon, B. G. *et al.* Intramembrane binding of VE-cadherin to VEGFR2 and VEGFR3  
377 assembles the endothelial mechanosensory complex. *J Cell Biol* **208**, 975-986,  
378 doi:10.1083/jcb.201408103 (2015).
- 379 38 Bray, N. L., Pimentel, H., Melsted, P. & Pachter, L. Near-optimal probabilistic RNA-seq  
380 quantification. *Nat Biotechnol* **34**, 525-527, doi:10.1038/nbt.3519 (2016).
- 381 39 Pimentel, H., Bray, N. L., Puente, S., Melsted, P. & Pachter, L. Differential analysis of  
382 RNA-seq incorporating quantification uncertainty. *Nat Methods* **14**, 687-690,  
383 doi:10.1038/nmeth.4324 (2017).
- 384 40 Luo, W., Friedman, M. S., Shedden, K., Hankenson, K. D. & Woolf, P. J. GAGE: generally  
385 applicable gene set enrichment for pathway analysis. *BMC Bioinformatics* **10**, 161,  
386 doi:10.1186/1471-2105-10-161 (2009).
- 387 41 Buenrostro, J. D., Giresi, P. G., Zaba, L. C., Chang, H. Y. & Greenleaf, W. J. Transposition  
388 of native chromatin for fast and sensitive epigenomic profiling of open chromatin, DNA-  
389 binding proteins and nucleosome position. *Nat Methods* **10**, 1213-1218,  
390 doi:10.1038/nmeth.2688 (2013).
- 391 42 Bolger, A. M., Lohse, M. & Usadel, B. Trimmomatic: a flexible trimmer for Illumina  
392 sequence data. *Bioinformatics* **30**, 2114-2120, doi:10.1093/bioinformatics/btu170 (2014).
- 393 43 Feng, J., Liu, T. & Zhang, Y. Using MACS to identify peaks from ChIP-Seq data. *Curr*  
394 *Protoc Bioinformatics* **Chapter 2**, Unit 2.14, doi:10.1002/0471250953.bi0214s34 (2011).
- 395



396 **Materials and Methods**

397 *Mouse strains*

398 All animal procedures were approved by the Institute for Animal Care and Use Committees at  
399 Yale University and the University of Virginia. In this study, FUCCI-26aP mice<sup>7</sup> were bred with  
400 Cdh5-CreER<sup>T2</sup> mice<sup>14</sup> to generate endothelial-specific FUCCI expression after tamoxifen  
401 injection. Tamoxifen (Sigma Cat# T5648) was resuspended in 10% EtOH and 90% Corn oil  
402 (Sigma Cat# C8267) at 4 mg/mL, and 25  $\mu$ L was injected per pup. Additionally, Gja4<sup>-/-</sup> (Cx37-  
403 KO) mice<sup>35</sup> were bred with R26p-Fucci2 mice<sup>36</sup> to generate FUCCI expression in Cx37-KO mice.

404

405 *Retina isolation, staining and quantification*

406 Retinas were isolated from mice, stained and imaged as previously described<sup>4</sup>. All antibodies are  
407 listed in Table S1. For retina imaging, isolated retinas were immunostained for CD31, Erg1/2/3,  
408 or  $\alpha$ SMA, with fluorescent secondary antibodies. Stained retinas were imaged by confocal  
409 microscopy (Leica SP8 or Leica SP5). Endothelial cells along arterial branches and venous  
410 branches were quantified by Erg1/2/3 expression in the nuclei, and cell cycle was determined by  
411 FUCCI expression (Early G1 by mCherry<sup>-</sup>mVenus<sup>-</sup>; Late G1 by mCherry<sup>+</sup>mVenus<sup>-</sup>; S/G2/M by  
412 mCherry<sup>-</sup>mVenus<sup>+</sup>). For isolation of endothelial cells from retinas, dissected retinas were digested  
413 with Collagenase Type II (1.0 mg/mL, Gibco Cat# 17101015) in DMEM (Gibco Cat# 21013024)  
414 and 10% FBS (Gibco Cat# 26140079) for 20 min, washed, stained for anti-CD31 and -CD45 in  
415 staining buffer (HBSS with 10% FBS, 20 mM HEPES, 1 mg/mL D-Glucose), then resuspended in  
416 FACS buffer (PBS with 1% FBS). FUCCI cell populations were isolated by FACS through a  
417 CD31<sup>+</sup>CD45<sup>-</sup> gating strategy, then by mCherry/mVenus to determine cell cycle. Cells were sorted  
418 into RNA lysis buffer, and RNA was purified with RNeasy Micro Kit (Qiagen Cat# 74034). FACS  
419 was performed with a BD FACSAria at either the Yale Flow Cytometry Core or the University of  
420 Virginia Flow Cytometry Core.

421

422 *Quantitative RT-PCR*

423 Purified RNA was converted to cDNA using the High-Capacity cDNA Reverse Transcription Kit  
424 (ThermoFisher Cat# 4368814) and quantified by Power SYBR Green PCR Master Mix  
425 (ThermoFisher Cat# 4368577) via qRT-PCR (Applied Biosystems QuantStudio 6). Gene-specific

426 primers are listed in Table S2. Relative quantification was determined by the delta-delta-CT  
427 method.

428

#### 429 *Generation of HUVEC-FUCCI*

430 Primary Human Umbilical Vein Endothelial Cells (HUVEC) were obtained from either the Yale  
431 Vascular Biology and Therapeutics Core. HUVEC were passaged in Endothelial Cell Growth  
432 Medium (PromoCell Cat# C-22010) and experiments were performed in EGM-2 (Lonza Cat# CC-  
433 3162). Experiments used cells between passage 4 and 8. HUVEC were infected with lentivirus  
434 generated with HEK293T cells infected with the Fast-FUCCI plasmid<sup>13</sup>; pBOB-EF1-FastFUCCI-  
435 Puro was a gift from Kevin Brindle & Duncan Jodrell (Addgene plasmid # 86849;  
436 <http://n2t.net/addgene:86849>; RRID:Addgene\_86849). Cells were selected and passaged in  
437 Puromycin (1 µg/mL, Sigma P9620).

438

#### 439 *HUVEC-FUCCI treatment with shear stress and ligands*

440 HUVEC-FUCCI were plated on 25-55mm cell plastic slides pre-treated with 10 µg/mL  
441 fibronectin, then subjected to venous (4 dynes/cm<sup>2</sup>) or arterial (12 dynes/cm<sup>2</sup>) shear flow forces in  
442 parallel plate flow chambers (pressure-dampened, gravity-driven dual reservoir system with media  
443 re-circulating via a peristaltic pump (Masterflex, Cole Palmer) and maintained at 37 C, 5% CO<sub>2</sub>)  
444 for 24 hr, as previously described<sup>37</sup>. Additionally, HUVEC-FUCCI were seeded in a 6-well plate  
445 at 5x10<sup>4</sup> cells per well, then treated with control media or media supplemented with TGF-β1 (1  
446 ng/mL, R&D Systems Cat# 240-B) or BMP4 (5 ng/mL (?), R&D Systems Cat# 314-BP). Cells  
447 were incubated with ligand for 8 hours. Cells were then lifted by Trypsin, and cell cycle was  
448 determined by flow cytometry with FUCCI reporter expression.

449

#### 450 *FACS of HUVEC-FUCCI*

451 Sorting of HUVEC-FUCCI into cell cycle states was performed by lifting subconfluent cells from  
452 cell culture with Accutase (Sigma Cat# A6964), washing cells and resuspending in FACS buffer.  
453 Fluorescent levels of mCherry and mVenus were used to determine cell cycle state. Cells were  
454 either sorted by FACS with a BD FACSAria or BD FACSMelody, or analyzed by flow cytometry  
455 with a BD LSRII.

#### 456 *HUVEC-FUCCI bulk RNA sequencing and data analysis*

457 RNA from HUVEC-FUCCI sorted into different cell cycle states was purified and submitted for  
458 next-generation transcriptome sequencing to the Yale Center for Genomic Analysis (Illumina  
459 HiSeq4000). Raw read data was quality-control checked (FastQC), aligned to human genome  
460 GRCh38 using Kallisto<sup>38</sup>, and analyzed for total and differential gene expression using Sleuth<sup>39</sup>  
461 (Supplemental Data 1). Gene Ontology analysis was performed with GAGE<sup>40</sup> (Supplemental Data  
462 2).

463

#### 464 *Western blot analysis*

465 Protein was isolated from cells using RIPA Buffer (Sigma Cat# R0278) or sorted directly into  
466 Laemmli Buffer (BioRad Cat# 1610747). Western blot analysis was performed using the Criterion  
467 Vertical Electrophoresis Cell (BioRad Cat# 1656020) with 4%-15% Criterion Tris-HCl Protein  
468 Gels (BioRad Cat# 3450028) and imaged with the Azure Biosystems c300. Western blots were  
469 quantified by ImageJ densitometry analysis.

470

#### 471 *TGF- $\beta$ 1/BMP4 ligand induction*

472 Subconfluent HUVEC-FUCCI were lifted and sorted into early G1 and late G1 cell cycle states,  
473 then seeded at  $5 \times 10^4$  cells per well into 6-well plates. Cells were left to attach to the plate for 1 hr  
474 in a 37<sup>o</sup> C, 5% CO<sub>2</sub> incubator, then media was changed with new media supplemented with  
475 control, TGF- $\beta$ 1 (1 ng/mL, R&D Systems Cat# 240-B) or BMP4 (5 ng/mL, R&D Systems Cat#  
476 314-BP). For co-immunoprecipitation experiments, cells were incubated in ligands for 2 hr, then  
477 SMAD4 complexes were isolated using the Pierce Co-Immunoprecipitation Kit (ThermoFisher  
478 Cat# 26149) per manufacturer's instructions. For chromatin immunoprecipitation experiments,  
479 cells were incubated in ligands for 4 hr, then SMAD4-DNA complexes were isolated using the  
480 High-Sensitivity ChIP Kit (AbCam Cat# ab185913), per manufacturer's instructions. For gene  
481 induction experiments, cells were incubated in ligands for 8 hr, then RNA lysate was collected and  
482 qRT-PCR was performed.

483

#### 484 *HUVEC-FUCCI ATAC-sequencing and data analysis*

485 Subconfluent HUVEC-FUCCI were lifted and sorted into early G1 and late G1 cell cycle states,  
486 then immediately collected for ATAC-sequencing analysis. Library preparation was performed as  
487 previously described<sup>41</sup>. Sequencing was performed at the Yale Center for Genomic Analysis

488 (Illumina HiSeq4000). Raw read data was quality controlled with FastQC (Babraham  
489 Bioinformatics), filtered and trimmed with Trimmomatic<sup>42</sup>, then peaks were called with MACS2<sup>43</sup>,  
490 and differential peak analysis was performed with HOMER (UCSD) (Supplemental Data 3).

491

#### 492 *Transfection of siRNA*

493 HUVEC-FUCCI were transfected with ThermoFisher Silencer Select siRNA targeting SMAD1  
494 (Cat# s8394), SMAD2 (Cat# s8397), SMAD3 (Cat# s8400), or SMAD5 (Cat# s8406). RNAiMAX  
495 Lipofectamine (ThermoFisher Cat# 13778075) was used to package and transfect siRNA into  
496 HUVEC-FUCCI, per manufacturer's instructions. After 48 hr, HUVEC-FUCCI were lifted and  
497 sorted by FACS into early G1 or late G1, then induced with ligand, as previously described.

498

#### 499 *Cdk4/6 inhibitor administration in mice*

500 Cdk4/6 inhibition in mice was performed by resuspending Palbociclib (Sigma-Aldrich Cat#  
501 PZ0383) in 50 mM Sodium lactate (Sigma Cat# L7022) at 12 mg/mL, then administered to pups  
502 at P3, P4, and P5 by oral gavage. Retinas were isolated at P6. EdU incorporation assay was  
503 performed using the Click-It EdU Cell Proliferation Kit (ThermoFisher Cat# C10340) per  
504 manufacturer's instructions, with EdU injection into mice 5 hours before euthanasia at P6.

505

#### 506 *Statistical analysis*

507 Unless otherwise indicated, statistical analysis was performed using either a standard two-tail  
508 Student's t-test or a two-way ANOVA test followed by a Tukey's multiple comparison corrected  
509 post-hoc test. All statistical analysis of RNA sequencing and ATAC sequencing data sets was  
510 performed through computational analysis packages, which contain statistical corrections for large  
511 data sets.

512 **Table S1.** Antibodies used in immunofluorescence, FACS, western blot and immunoprecipitation

| <b>Application</b> | <b>Antibody</b>                 | <b>Source</b>                |                           |
|--------------------|---------------------------------|------------------------------|---------------------------|
| Immunofluorescence | Goat anti-Mouse CD31            | R&D Systems Cat# AF3682      |                           |
|                    | Rabbit anti-Mouse ERG1/2/3      | AbCam Cat# ab92513           |                           |
|                    | Mouse anti-Mouse $\alpha$ SMA   | ThermoFisher Cat# 50-9760-82 |                           |
| FACS               | CD31-APC Rat anti-Mouse         | BD Biosciences Cat# 551262   |                           |
|                    | CD45-V450 Rag anti-Mouse        | BD Biosciences Cat# 560501   |                           |
| Western Blot       | Goat anti-TGFBR1                | R&D Systems Cat# AF3025      |                           |
|                    | Phospho-SMAD3 Rabbit mAb        | Cell Signaling Cat# 9520     |                           |
|                    | Phospho-SMAD1/5/9 Rabbit mAb    | Cell Signaling Cat# 13820    |                           |
|                    | B Actin Rabbit mAb              | Cell Signaling Cat# 4970     |                           |
|                    | SMAD2/3 Rabbit mAb              | Cell Signaling Cat# 8685     |                           |
|                    | SMAD1 Rabbit mAb                | Cell Signaling Cat# 6944     |                           |
|                    | SMAD5 Rabbit mAb                | Cell Signaling Cat# 12534    |                           |
|                    | SMAD4 Rabbit mAb                | Cell Signaling Cat# 46535    |                           |
|                    | Rabbit anti-BMPR2               | AbCam Cat# ab96826           |                           |
|                    | Goat anti-Human ALK1            | R&D Systems Cat# AF370       |                           |
|                    | Rabbit anti-TGF beta RII        | AbCam Cat# ab186838          |                           |
|                    | Goat anti-Human Endoglin        | R&D Systems Cat# AF1097      |                           |
|                    | Phospho p44/42 MAPK (Erk1/2)    | Cell Signaling Cat# 9106     |                           |
|                    | P44/42 MAPK (Erk1/2)            | Cell Signaling Cat# 9102     |                           |
|                    | Akt Rabbit Ab                   | Cell Signaling Cat# 9272     |                           |
|                    | Phospho Akt (Ser473) Rabbit mAb | Cell Signaling Cat# 4060     |                           |
|                    | Horse anti-Goat IgG (H+L)       | Vector Labs Cat# PI-9500     |                           |
|                    | Goat anti-Rabbit IgG (H+L)      | Vector Labs Cat# PI-1000     |                           |
|                    | Immunoprecipitation             | SMAD4 Rabbit mAb             | Cell Signaling Cat# 46535 |

514 **Table S2.** Gene-specific primers for qRT-PCR

| <b>Gene</b>           | <b>Forward Primer (5'-3')</b> | <b>Reverse Primer (5'-3')</b> |
|-----------------------|-------------------------------|-------------------------------|
| Mouse Efnb2           | GTGCCAGACAAGAGCCATGAA         | GGTGCTAGAACCTGGATTTGG         |
| Human EFNB2           | TATGCAGAACTGCGATTTCCAA        | TGGGTATAGTACCAGTCCTTGTC       |
| Mouse Gja4            | CCCACATCCGATACTGGGTG          | CGAAGACGACCGTCCTCTG           |
| Human GJA4            | ACACCCACCCTGGTCTACC           | CACTGGCGACATAGGTGCC           |
| Mouse Gja5            | CCACAGTCATCGGCAAGGTC          | CTGAATGGTATCGCACCGGAA         |
| Human GJA5            | CCGTGGTAGGCAAGGTCTG           | ATCACACCGGAAATCAGCCTG         |
| Mouse Hey2            | AAGCGCCCTTGTGAGGAAAC          | GGTAGTTGTGCGTGAATTGGAC        |
| Mouse Ephb4           | CACCCAGCAGCTTGATCCTG          | ACCAGGACCACCCACAAC            |
| Human EPHB4           | CGCACCTACGAAGTGTGTGA          | GTCCGCATCGCTCTCATAGTA         |
| Mouse Nr2f2           | ATGTAGCCCATGTGGAAAGC          | CCTACCAAACGGACGAAAAA          |
| Human NR2F2           | GGACCACATACGGATCTTCCAA        | ACATCAGACAGACCACAGGCAT        |
| Mouse Dll4            | GGAACCTTCTCACTCAACATCC        | CTCGTCTGTTCCGCAAATCT          |
| Mouse Notch1          | TATGGCCACGAGGAAGAGCT          | TAGACAATGGAGCCACGGATG         |
| Mouse Alk1            | TGACCTCAAGAGTCGCAATG          | CTCGGGTGCCATGTATCTTT          |
| Mouse Cdkn1b          | TCAAACGTGAGAGTGTCTAACG        | CCGGGCCGAAGAGATTTCTG          |
| Human SMAD1           | ACCTGCTTACCTGCCTCCTG          | CATAAGCAACCGCCTGAACA          |
| Human SMAD2           | ACCGAAATGCCACGGTAGAA          | TGGGGCTCTGCACAAAGAT           |
| Human SMAD3           | CCTGAGTGAAGATGGAGAAACC        | GGCTGCAGGTCCAAGTTATTA         |
| Human SMAD5           | AGCCTTCTGGTTCAGTTTAGG         | AAGGGCTGTTTGGAGATAAGG         |
| Mouse Actb            | AGAGGGAAATCGTGCGTGAC          | CAATAGTGATGACCTGGCCGT         |
| Human ACTB            | TCACCCACACTGTGCCCATCTACGA     | CAGCGGAACCGCTCATTGCCAATGG     |
| <i>ATAC-Seq Peaks</i> |                               |                               |
| EFNB2 +1293           | TCCTACAAACCCATCCTTCACA        | AGGATTTTCAGAGAGCGAGAGG        |
| EFNB2 -15416          | TTTCTCCTAAAACCAGGCCCAA        | GTCTCGGGAAACTTGGAGAAGA        |
| EFNB2 -34865          | ACACGTAAGACTACCAATTAAGGA      | TCAGGGGAAATACAAAATAGGAGGT     |
| EPHB4 +2050           | CATTGTCGGTACTTGCGCATAG        | GTGAAACGCCGTCTCCAAAAAT        |
| EPHB4 -3482           | CTGCAGACCAAACCAAACCTCAG       | CTATGCGCAAGTACCGACAATG        |

516 **Supplemental Data 1.** Gene expression results from bulk RNA sequencing of early G1 and late  
517 G1 HUVEC-FUCCI

518 *Additional attachment*

519

520 **Supplemental Data 2.** Gene ontology results from bulk RNA sequencing of early G1 and late G1  
521 HUVEC-FUCCI

522 *Additional attachment*

523

524 **Supplemental Data 3.** Peak quantification results from ATAC sequencing of early G1 and late  
525 G1 HUVEC-FUCCI

526 *Additional attachment*

527

528 **Figure legends**

529

530 **Figure 1. Endothelial Cell Cycle State during Retina Vascular Development.** A) FUCCI  
531 reporter distinguishes early G1, late G1 and S/G2/M cell cycle states. B) P6 retinas of Fucci2aR  
532 mice imaged for CD31, Erg1/2/3, hCdt1(30/120) and hGem(1/110) (scale bar = 200 $\mu$ m),  
533 magnified on C) artery and D) vein (scale bar = 50 $\mu$ m). E) P15 retinas imaged, magnified on F)  
534 artery and G) vein. H-I) Cell cycle states quantified in arteries and veins at P6 and P15. Gene  
535 expression of retina endothelial cells in different cell cycle states at P6 and P15 quantified for J-  
536 K) arterial genes and L-M) venous genes.

537

538 **Figure 2. Endothelial Cell Cycle-Dependent Regulation of TGF- $\beta$ /BMP Pathway.** A)  
539 HUVEC-FUCCI reporter distinguishes early G1, late G1 and S/G2/M cell cycle states, visualized  
540 by B) fluorescent imaging, and C) FACS. In bulk RNA sequencing of early G1 and late G1  
541 HUVEC-FUCCI, D) top 1000 significantly varying genes, E) Signaling Pathway GO Term  
542 analysis, and F) Volcano plot of fold-change against the log<sub>10</sub>(q-value) (TGF- $\beta$ /BMP signaling  
543 pathways in orange). G) Western blots of TGF- $\beta$ /BMP signaling proteins in early G1 and late G1,  
544 quantified in H).

545

546 **Figure 3. Endothelial Cell Cycle-Dependent Arterial-venous Specification via TGF- $\beta$ /BMP**  
547 **Signaling.** A) Overview of the TGF- $\beta$ /BMP signaling pathway. B) Western blot for SMAD  
548 proteins of lysates from SMAD4 co-immunoprecipitation after TGF- $\beta$ 1/BMP4-treated early G1  
549 and late G1 HUVEC-FUCCI, quantified in C). D) qRT-PCR analysis of DNA regions near EFNB2  
550 and EPHB4 binding to SMAD4 complexes by chromatin-immunoprecipitation. E) TGF- $\beta$ 1/BMP4  
551 induction of arterial and venous genes in early G1 and late G1 HUVEC-FUCCI. F) TGF- $\beta$ 1/BMP4  
552 induction of EFNB2 and EPHB4 after SMAD2/3 or SMAD1/5 siRNA knockdown.

553

554 **Figure 4. Rescue of Arterial-venous Development Defects with Pharmacological CDK4/6**  
555 **Inhibition.** A-C) P6 retinal vasculature of WT, Cx37-KO and Cx37-KO+CDK4/6i treated mice  
556 imaged for CD31 and  $\alpha$ SMA (scale bars = 200 $\mu$ m), quantified for D) vascular density, and E)  
557  $\alpha$ SMA coverage. P6 retinal vasculature of Fucci2, Fucci2+Cx37-KO and Fucci2+Cx37-  
558 KO+CDK4/6i treatment imaged for CD31, hCdt1(30/120), hGem(1/110) and Erg1/2/3 and  
559 quantified for cell cycle state in F-I) arterial blood vessels, J-M) venous blood vessels, and N-Q)



560 plexi above venous blood vessels (scale bars = 50 $\mu$ m, vessels outlined in dotted white lines, cell  
561 cycle state highlighted with colored stars).

562

563 **Extended Figure 1. Endothelial Cell Cycle State During Retina Vascular Development. A)**

564 Cell cycle state of FUCCI2 mouse retinal endothelial cells. Endothelial cell cycle state in **B)**  
565 confocal z-stack imaged femoral vessels, and **C)** quantified aorta and vena cava endothelial cells.

566 **D)** Overview of Artery/Vein Distance Ratio determination. **E)** Probability density of Artery/Vein

567 Distance Ratio for retinal endothelial cells in early G1, late G1 or S/G2/M. **F)** HUVEC-FUCCI

568 cell cycle changes in response to arterial and venous shear stress. Gene expression of Dll4,

569 Notch1, Alk1, and Cdkn1b in retinal endothelial cells in cell cycle states at **G)** P6 and **H)** P15.

570

571 **Extended Figure 2. Cell Cycle-Dependent Expression of TGF- $\beta$ /BMP Pathway in HUVEC-**

572 **FUCCI. A)** Western blot of TGF- $\beta$ /BMP signaling proteins in HUVEC-FUCCI in early G1 and

573 late G1 (n = 3), **B)** quantified. **C)** Western blot of ERK1/2 and AKT phosphorylation in HUVEC-

574 FUCCI in early G1 and late G1 after TGF- $\beta$ 1 or BMP4 treatment, **D-F)** quantified.

575

576 **Extended Figure 3. Cell Cycle-Dependent Arterial-venous Specification via TGF- $\beta$ /BMP**

577 **Signaling in HUVEC-FUCCI. Peaks from ATAC-Sequencing of HUVEC-FUCCI in early G1**

578 and late G1 around the **A)** EFNB2 locus, and **B)** EPHB4 locus. **C)** HUVEC-FUCCI cell cycle

579 states after TGF- $\beta$ 1 or BMP4 treatment. **D)** qRT-PCR of SMAD genes in HUVEC-FUCCI after

580 SMAD siRNA transfection.

581

582 **Extended Figure 4. Rescue of Arterial-venous Specification Defects with Pharmacological**

583 **CDK4/6 Inhibition. A)** HUVEC-FUCCI cell cycle states after CDK4/6i treatment. **B)** WT,

584 WT+CDK4/6i, Cx37-KO and Cx37-KO+CDK4/6i treated mice analyzed for weight over time. **C-**

585 **F)** P6 retinal vasculature of FUCCI2, FUCCI2+Cx37-KO and FUCCI2+Cx37-KO+CDK4/6i

586 treated mice imaged for CD31, hCdt1(30/120), hGem(1/110) and Erg1/2/3 and quantified for cell

587 cycle state in plexi above arterial blood vessels (scale bars = 50 $\mu$ m, vessels outlined in dotted white

588 lines, cell cycle state highlighted with colored stars). **G-J)** WT, WT+CDK4/6i, Cx37-KO and

589 Cx37-KO+CDK4/6i treated mice analyzed for EdU incorporation.

590

591 Figure 1

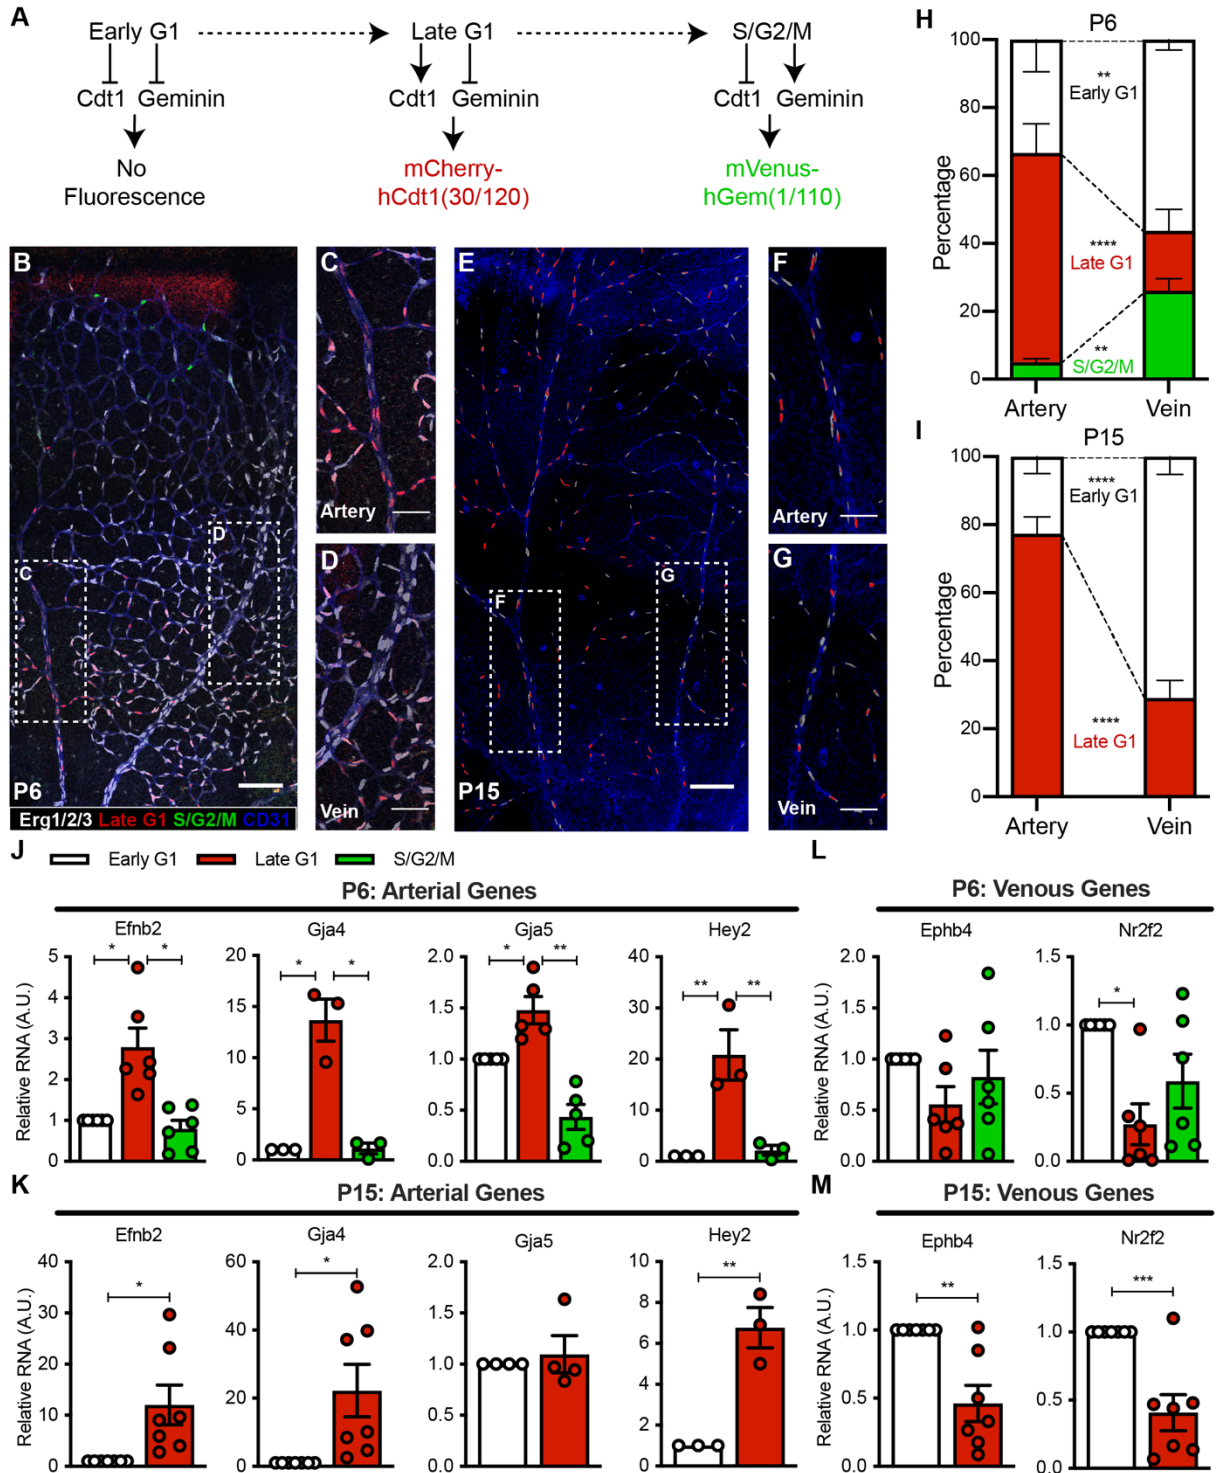

593 Figure 2

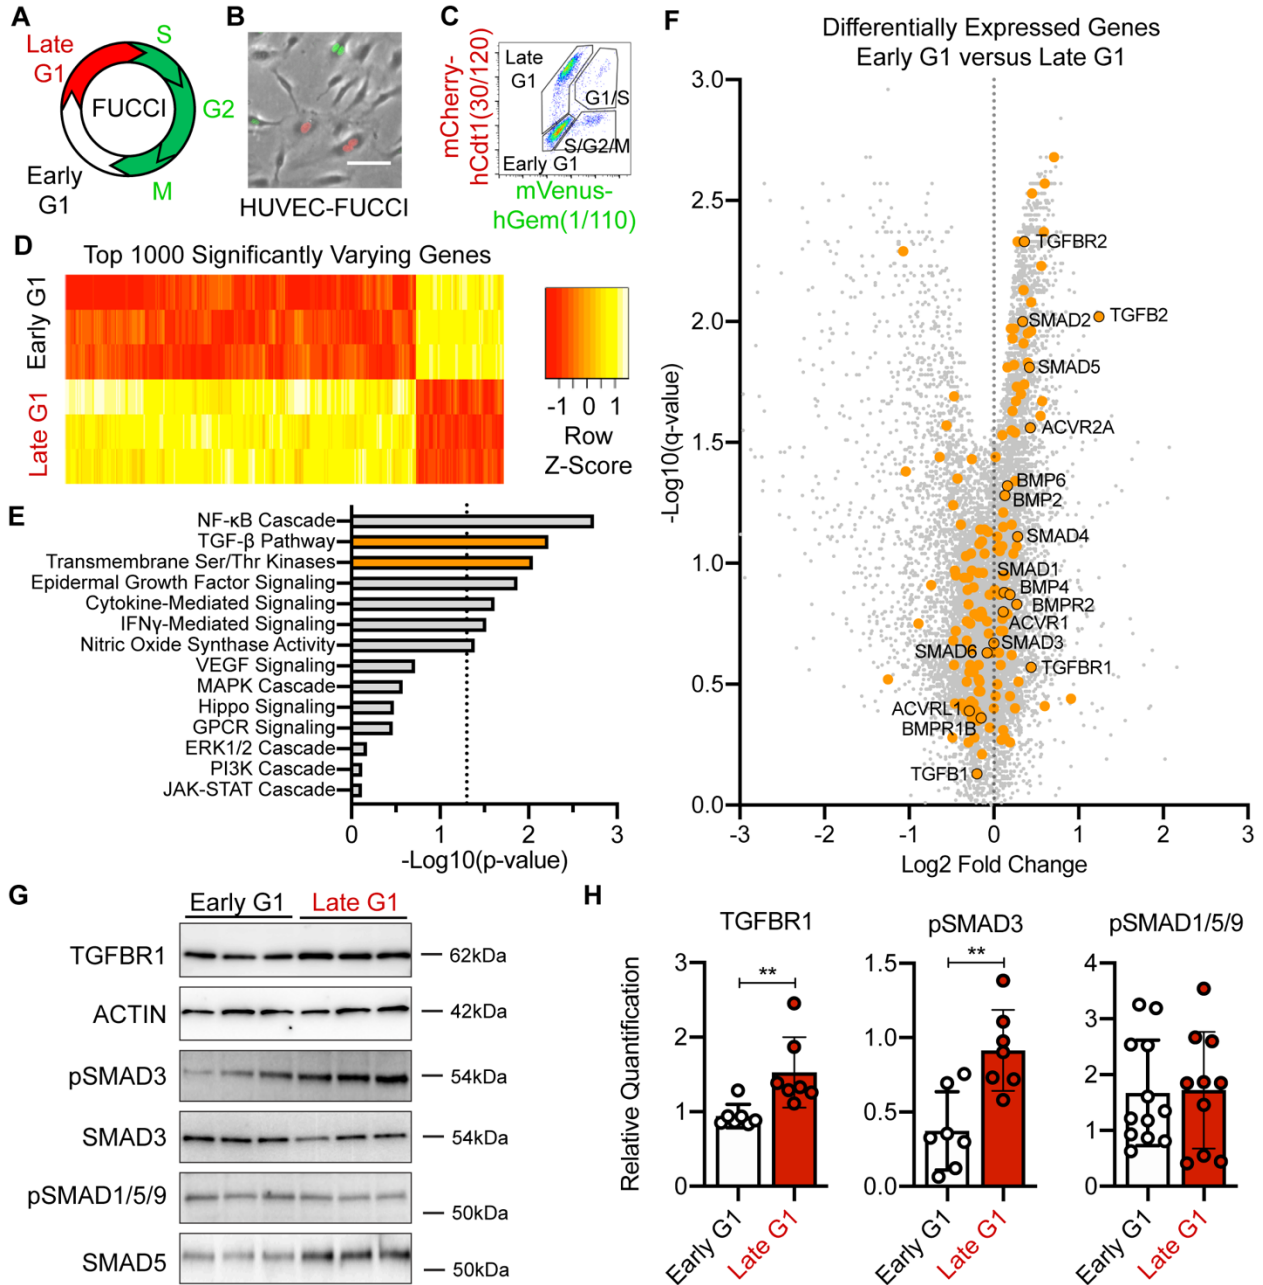

595 Figure 3

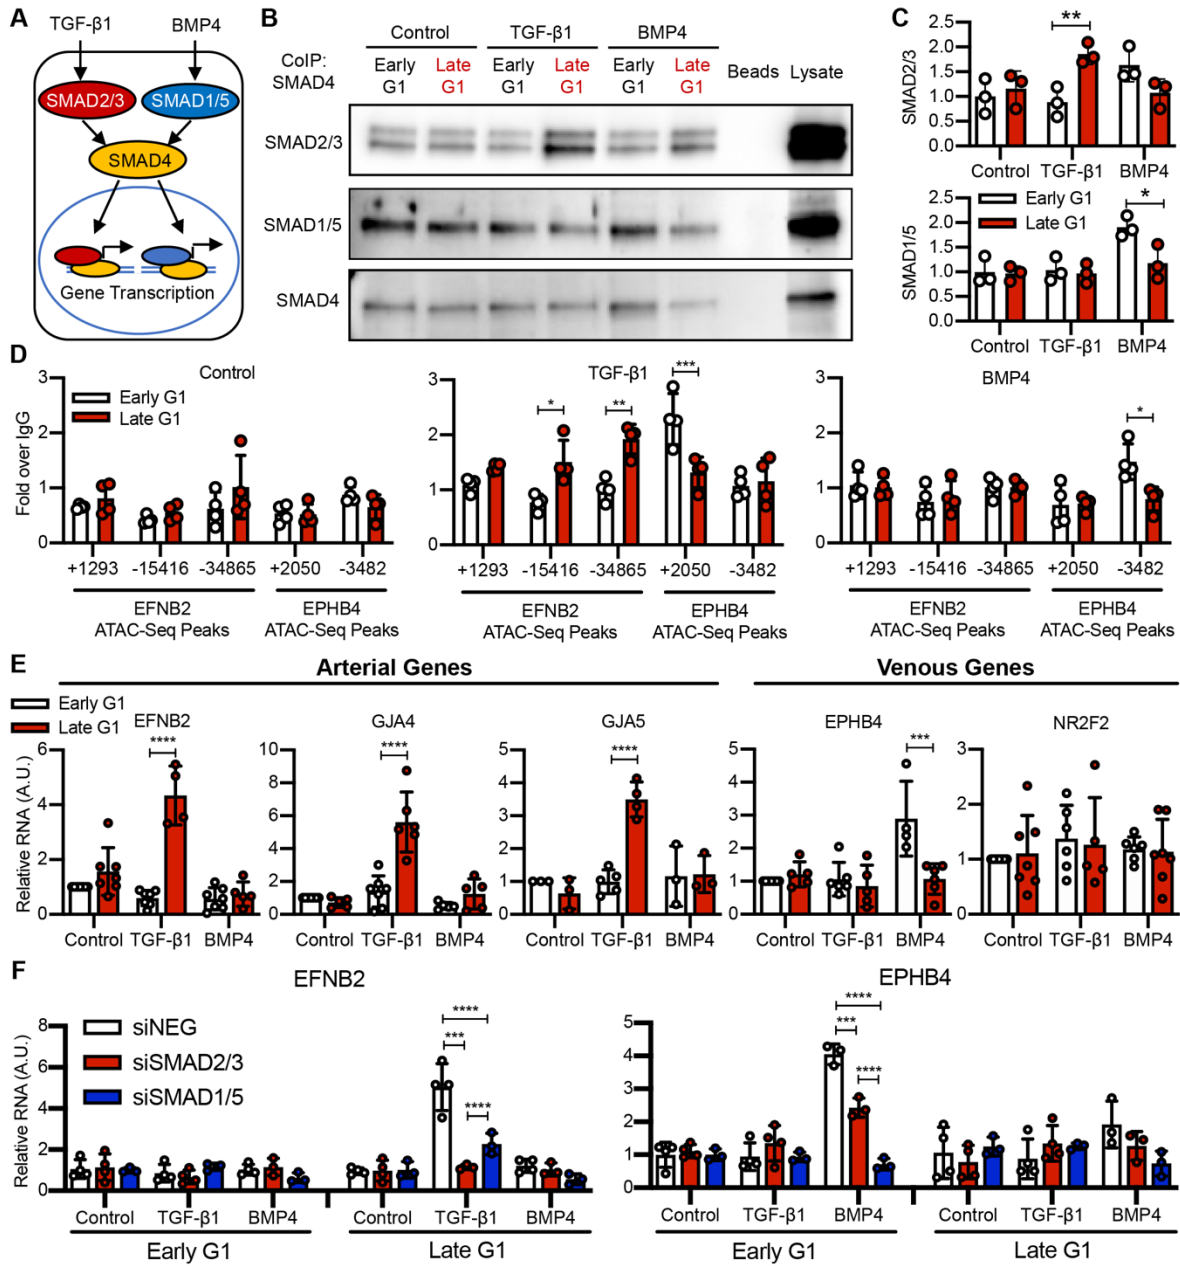

597 Figure 4

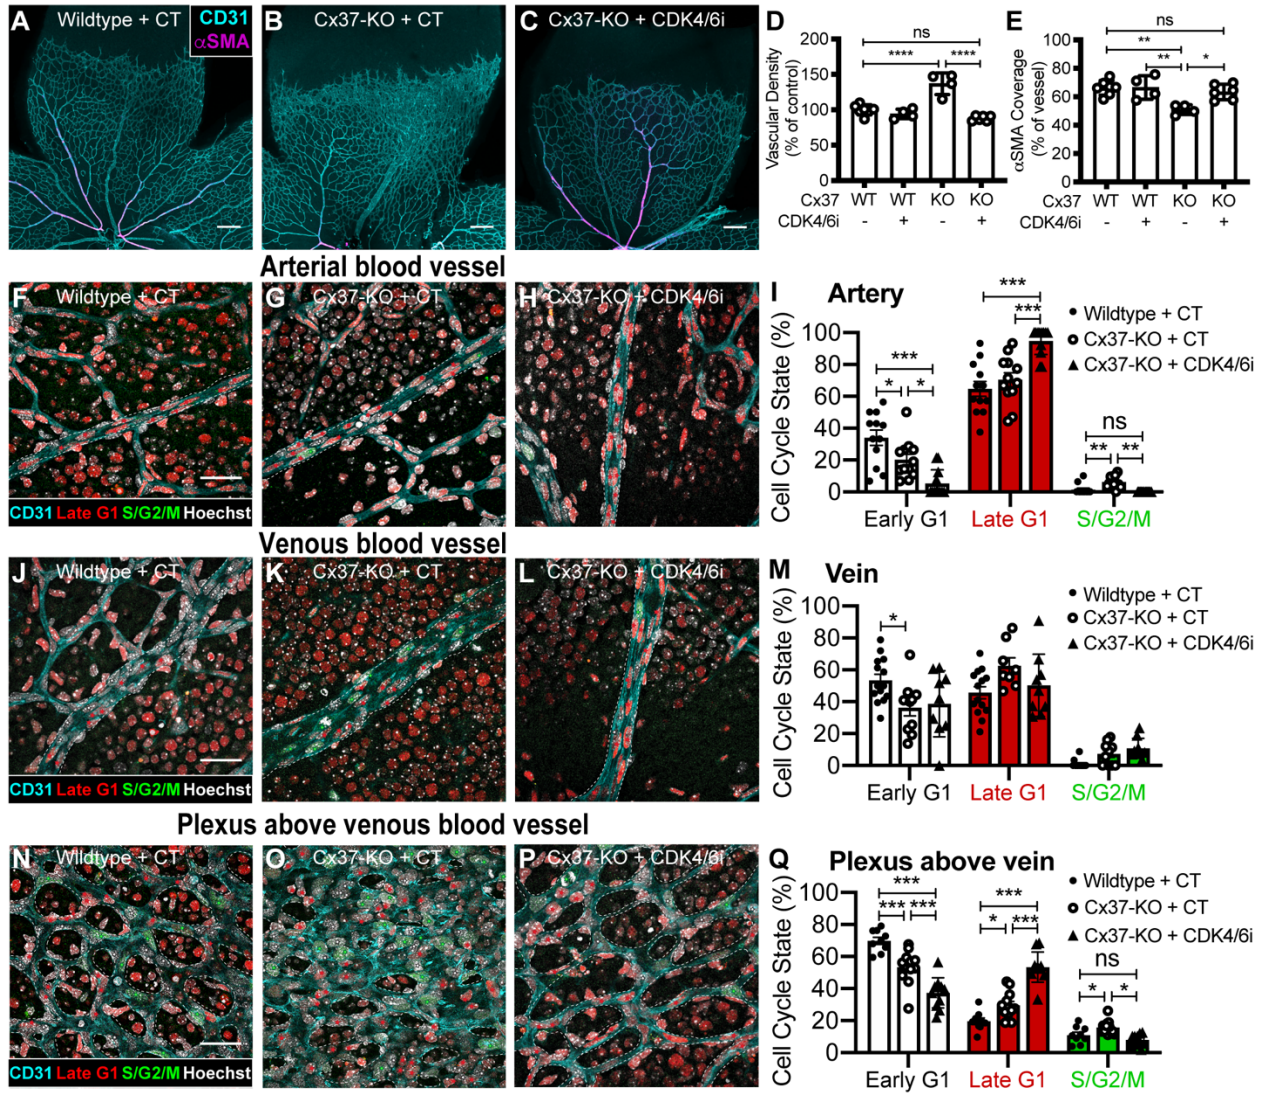

598

599 Extended Figure 1

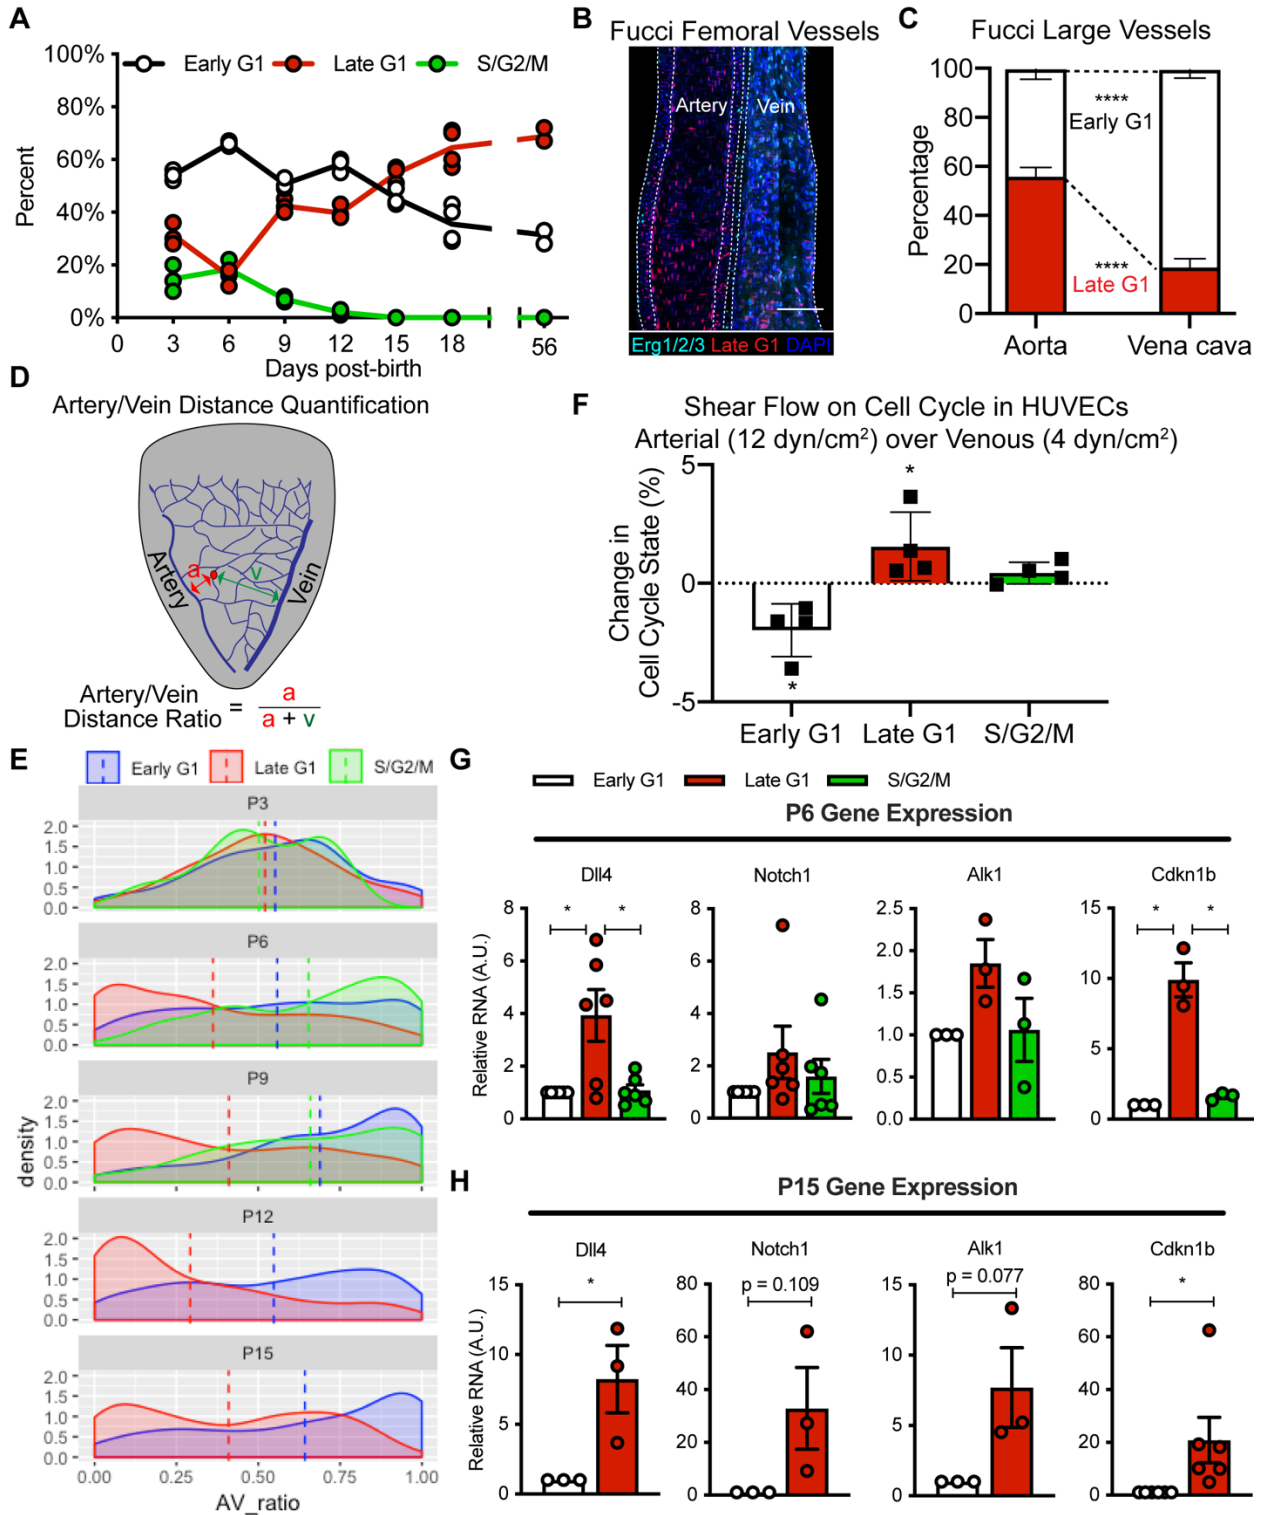

601 Extended Figure 2

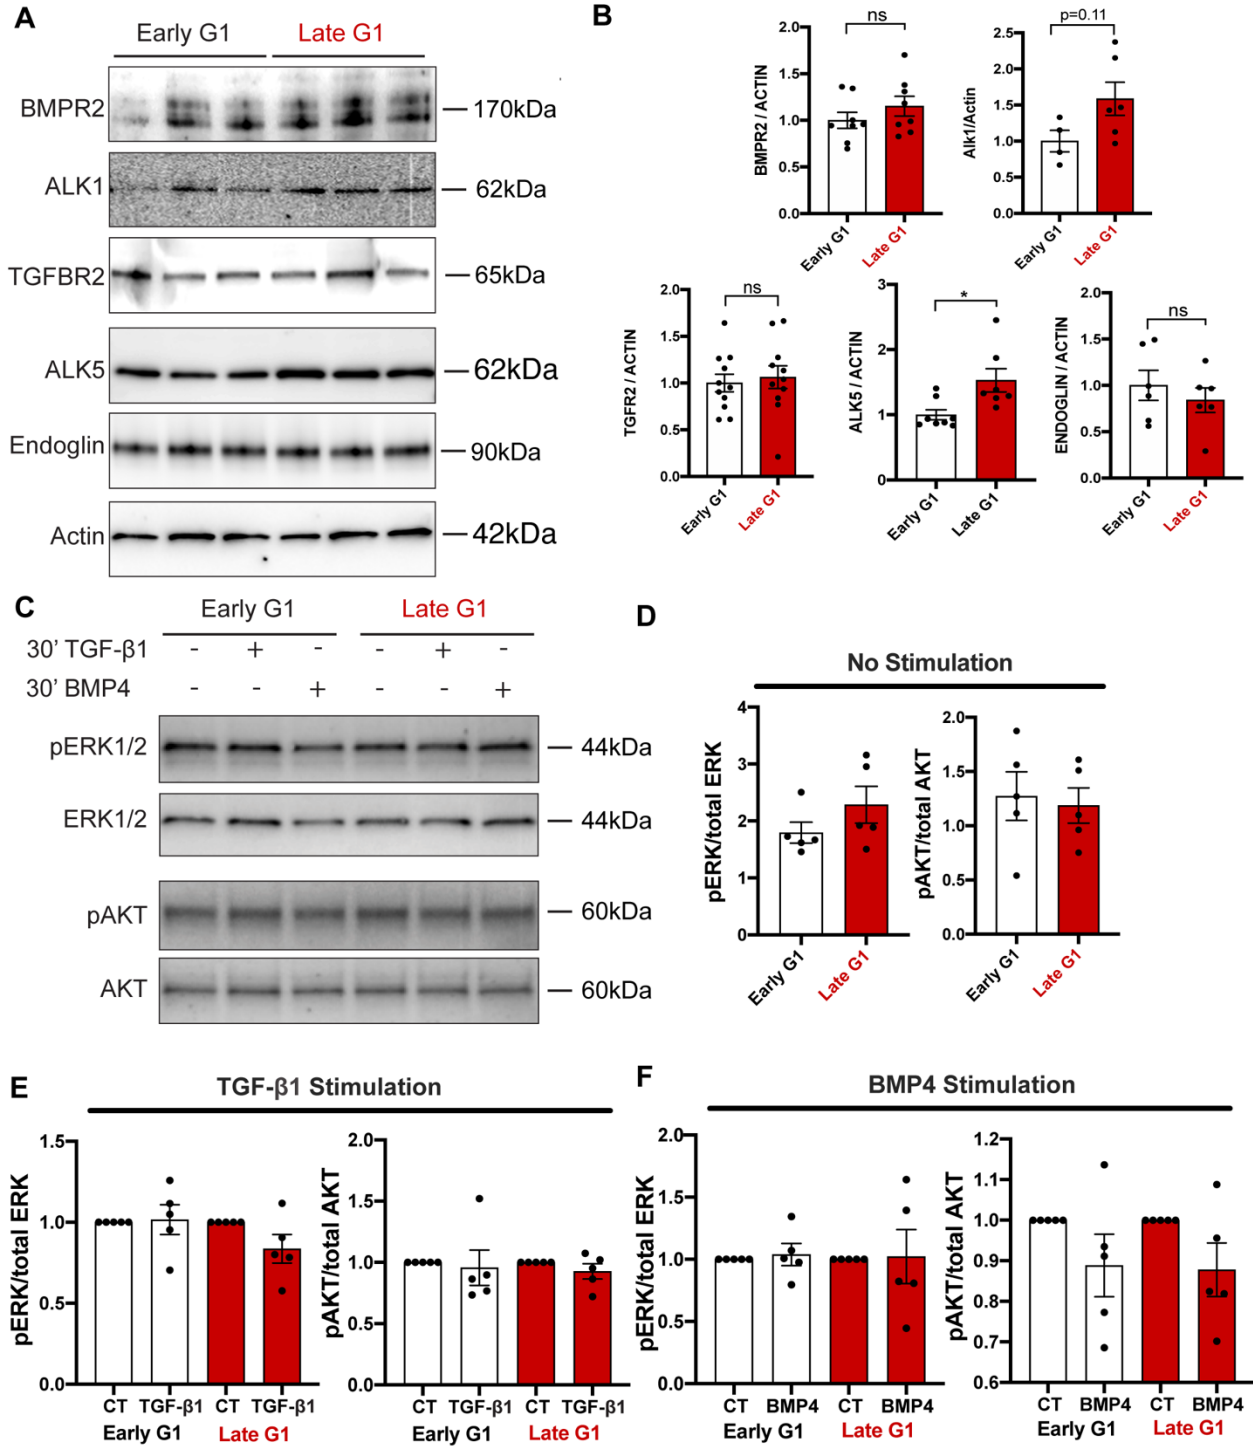

603 Extended Figure 3

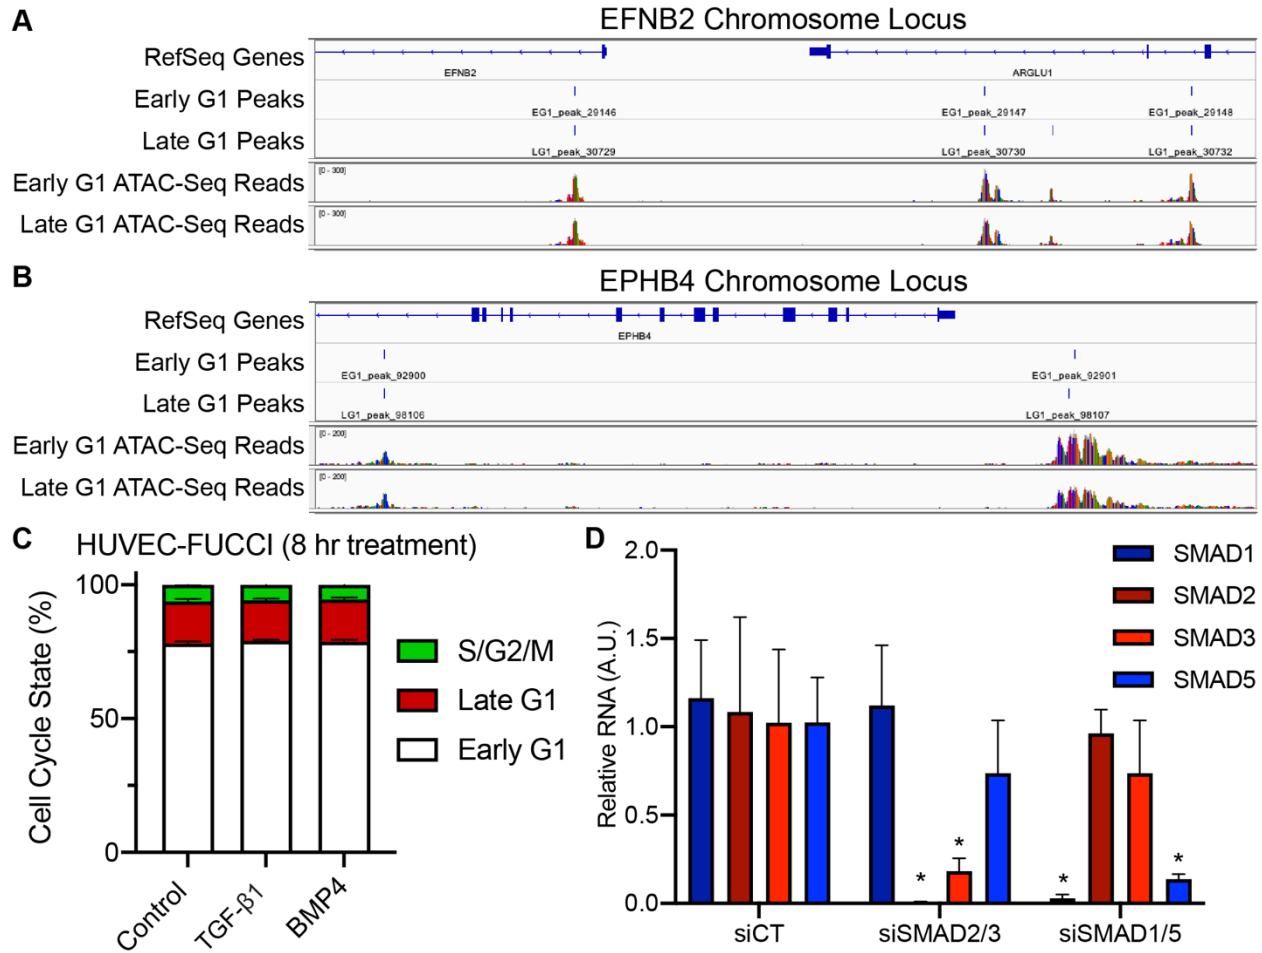

604



605 Extended Figure 4

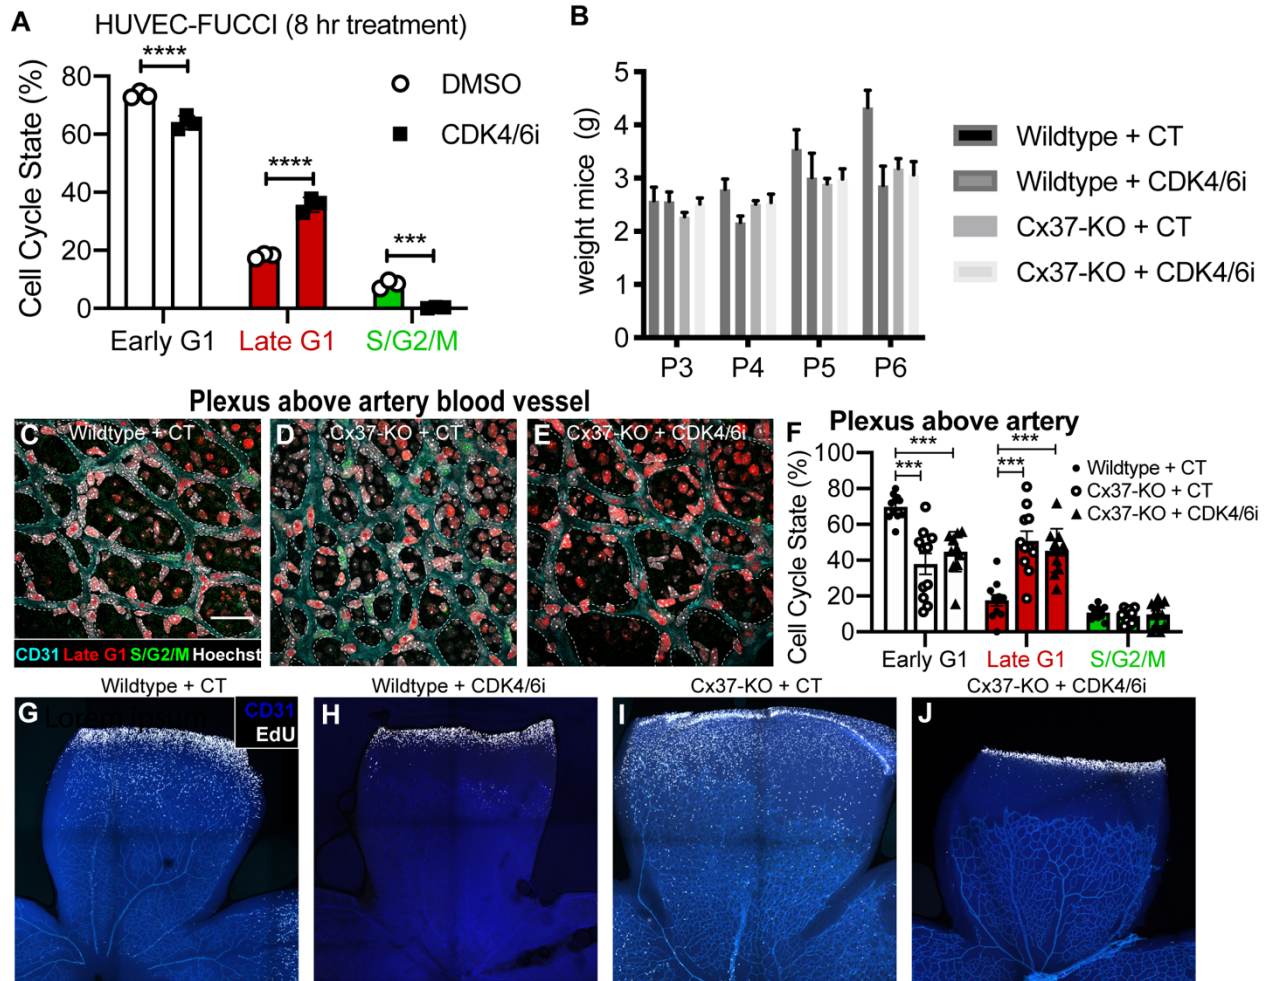

606
